# Supplementary material for: Emergency Services Utilization in Jakarta (Indonesia): A Cross-Sectional Study of Patients Attending Hospital Emergency Departments
Source: Research Square preprint supplement (doi:10.21203/rs.3.rs-871607/v1), 2021-09-15
Supplement: Supplementary file 3 [file c661b5fa0ac9853ac0d9b461.docx]

Supplementary Table 1. Demographic profile of patients attending the hospital emergency departments.

|  | Hospital | | | | | | Total |
| --- | --- | --- | --- | --- | --- | --- | --- |
|  | | A | B | C | D | E |
| Sex: | | N(%) | N(%) | N(%) | N(%) | N(%) | N(%) |
| Male | | 93(52.0) | 210(49.1) | 134(59.3) | 204(48.0) | 374(53.0) | 1015(51.7) |
| Female | | 86 (48.0) | 218 (50.9) | 92 (40.7) | 221 (52.0) | 332(47.0) | 949(48.3) |
| Total | | 179 (9.1) | 428 (21.8) | 226(11.5) | 425(21.6) | 706(36.0) | 1964(100.0) |
| Age**: | | Median (IQR) | Median (IQR) | Median (IQR) | Median (IQR) | Median (IQR) | Median (IQR) |
| Male | | 52(33,62) | 40(26,56) | 47(32,57) | 46(24,58) | 42(24,59) | 44(26,58) |
| Female | | 54(32,63) | 34(23,51) | 49(38,59) | 50(28,65) | 42(26,57) | 44(26,58) |
| Total | | 52(33,63) | 37(24,53) | 49(35,58) | 47(26,62) | 42(25,58) | 44(26,58) |
| Education: | | N(%) | N(%) | N(%) | N(%) | N(%) | N(%) |
| Elementary school | | 38 (21.2) | 54 (12.6) | 47 (20.8) | 117 (27.5) | 175 (24.8) | 431 (21.9) |
| Middle school | | 26 (14.5) | 42 (9.8) | 45 (19.9) | 90 (21.2) | 93 (13. 2) | 296 (15.1) |
| High school | | 64 (35.8) | 201 (47.0) | 95 (42.0) | 123 (28.9) | 281 (39.8) | 764 (38.9) |
| Diploma | | 1(0.6) | 37 (8.6) | 4(1.8) | 8(1.9) | 24(3.4) | 74(3.8) |
| Bachelor degree | | 33 (18.4) | 53 (12.4) | 23 (10.2) | 32(7.5) | 43(6.1) | 184(9.4) |
| Masters degree | | 4(2.2) | 4(0.9) | 0(0) | 4(0.9) | 3(0.4) | 15(0.8) |
| Doctoral degree | | 1  (0.6) | 4  (0.9) | 0  (0) | 0  (0) | 0  (0) | 5  (0.2) |
| Other | | 12 (6.7) | 33 (7.7) | 12 (5.3) | 51 (12.0) | 87 (12.3) | 195 (9.9) |
| Occupation: | | N(%) | N(%) | N(%) | N(%) | N(%) | N(%) |
| Civil servants | | 11 (6.2) | 6 (6.1) | 3 (1.3) | 11 (2.6) | 11 (1.6) | 62 (3.2) |
| Employee | | 31 (17.3) | 151 (35.3) | 55 (24.3) | 90 (21.2) | 189 (26.8) | 516 (26.3) |
| Professional | | 2  (1.1) | 7  (1.6) | 0  (0) | 0  (0) | 4  (0.6) | 13  (0.7) |
| Academic | | 0  (0) | 6  (1.4) | 6  (2.7) | 0  (0) | 12  (1.7) | 24  (1.2) |
| Entrepreneur | | 24 (13.4) | 80 (18.7) | 47 (20.8) | 81 (19.1) | 129 (18.3) | 361 (18.4) |
| Other | | 111 (62.0) | 158 (36.9) | 115 (50.9) | 243 (57.2) | 361 (51.1) | 988 (50.3) |
| Monthly income IDR (GBP))*: | | N(%) | N(%) | N(%) | N(%) | N(%) | N(%) |
| Rp 1-3 m (£55.46 - £166.37) | | 50(27.9) | 143(33.4) | 15(6.6) | 175(41.2) | 316(44.8) | 699(35.6) |
| RP 3,1-5 m (£171.64 - £276.84) | | 50 (27.9) | 140(32.7) | 66(29.2) | 184(43.3) | 188(26.6) | 628(32.0) |
| RP 5,1 - 8 m (£282.37 - £442.94) | | 20(11.2) | 36(8.4) | 37(16.4) | 23(5.4) | 34(4.8) | 150(7.6) |
| Over RP 8 m (Over £442.94) | | 0(0) | 13(3.0) | 12(5.3) | 0(0) | 4(0.6) | 29(1.5) |
| Do not have income | | 27(15.1) | 52(12.2) | 21(9.3) | 36(8.5) | 125(17.7) | 261(13.3) |
| Unknown | | 32(17.9) | 44(10.3) | 75(33.2) | 7(1.7) | 39(5.5) | 197(10.0) |
| Marital status: | | N(%) | N(%) | N(%) | N(%) | N(%) | N(%) |
| Not married | | 39 (21.8) | 133 (31.1) | 52 (23.0) | 115 (27.1) | 194 (27.5) | 533 (27.1) |
| Married | | 113 (63.1) | 267 (62.4) | 145 (64.2) | 262 (61.7) | 470 (66.6) | 1257 (64.0) |
| Widow/Widower | | 27 (15.1) | 28(6.5) | 29 (12.8) | 48 (11.3) | 42(6.0) | 174(8.9) |
| If married, no. of children: | | N(%) | N(%) | N(%) | N(%) | N(%) | N(%) |
| 0 | | 46 (25.7) | 146 (43.1) | 56 (24.8) | 131 (30.8) | 223 (31.6) | 602 (30.7) |
| 1 | | 17(9.5) | 65 (15.2) | 17(7.5) | 30(7.1) | 89 (12.6) | 218 (11.1) |
| 2 | | 59 (33.0) | 112 (26.2) | 76 (33.6) | 99 (23.3) | 209 (29.6) | 555 (28.3) |
| >= 3 | | 57 (31.8) | 105 (24.5) | 77 (34.1) | 165 (38.8) | 185 (26.2) | 589 (30.0) |

* The conversion rate Rp18,061.29 to £1 provided by xe.com on 20/05/2020.

** Median and IQR are rounded up.

All figures are rounded to 1 decimal point. The summation of the percentages may exceed 100% due to the rounding effect.
